# Supplementary material
Source: publisher figshare collection journal article supplement (https://acs.figshare.com/ndownloader/files/14084117)
Supplement: Supplementary file 1 [file 14084117]

## Supporting Information

# Development and Evaluation of Polyether Ether Ketone (PEEK) Capillary for Electrospray

Christian Sögaard<sup>\*,†</sup>, Isabelle Simonsson<sup>†</sup>, Zareen Abbas<sup>†</sup>

<sup>†</sup>Department of Chemistry and Molecular Biology, University of Gothenburg, Kemivägen 10, 41296, Gothenburg, Sweden

<sup>\*</sup>Corresponding Author

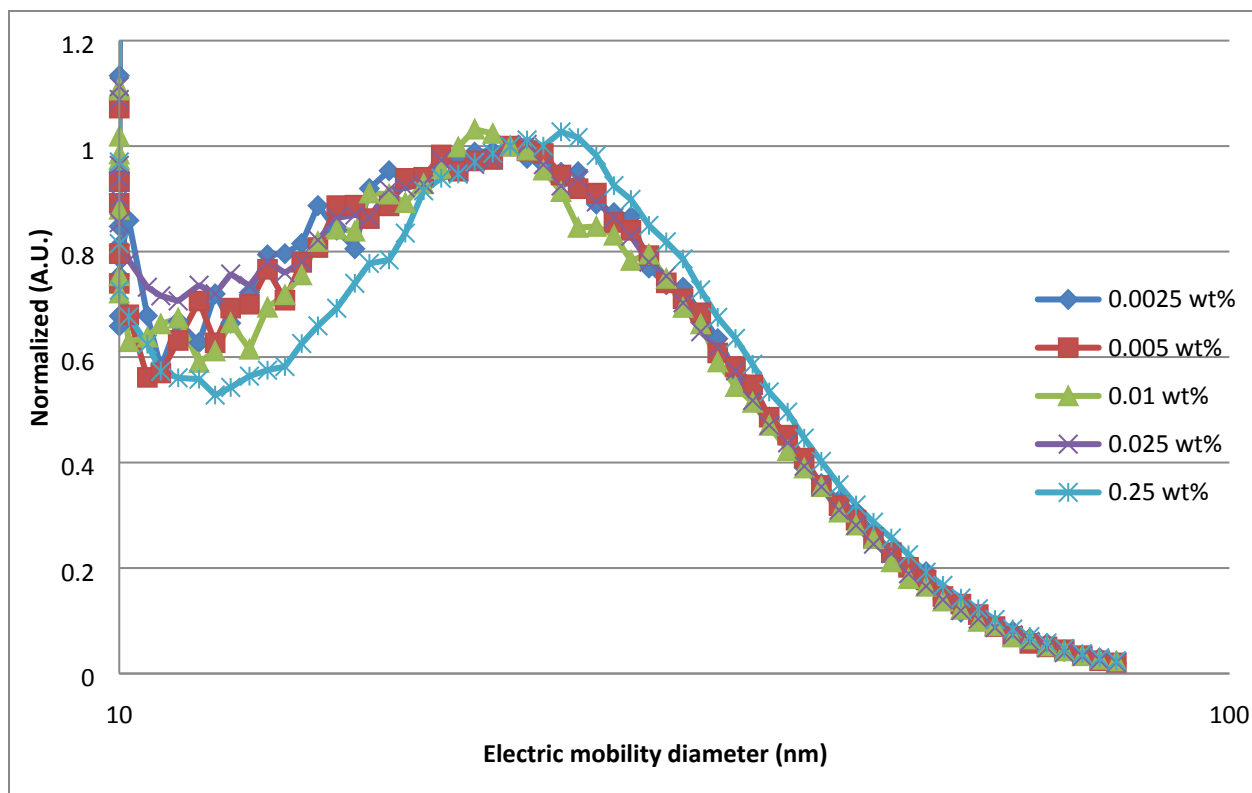

Figure S1: Size distributions for a number of silica particle concentrations. All concentrations <0.25 wt% show no clear shift while the 0.25 wt% distribution show a minor shift towards larger size distribution. This suggests that the concentration at 0.25 wt% is high enough to start generating more than one particle per sprayed droplet which is not desirable.
